# Supplementary material for: A deep-learning-based two-compartment predictive model (PKRNN-2CM) for vancomycin therapeutic drug monitoring
Source: bioRxiv or medRxiv preprint supplement (doi:10.1101/2024.01.30.24302025), 2024-01-31
Supplement: Supplementary file [file media-2.pdf]

## D Mathematical derivation

The mathematical derivation of the two-compartment pharmacokinetic (PK) model can be described by the following ordinary differential equation (ODE) system:

$$\begin{cases} \frac{dA}{dt} = -\frac{A}{V_1}k_1 + \left(\frac{A}{V_1} - \frac{B}{V_2}\right)k_2 + r = \frac{k_2-k_1}{V_1}A - \frac{k_2}{V_2}B + r \\ \frac{dB}{dt} = -\left(\frac{A}{V_1} - \frac{B}{V_2}\right)k_2 = -\frac{k_2}{V_1}A + \frac{k_2}{V_2}B \end{cases} \quad (1)$$

Here,  $A$  and  $B$  represent the masses of the central and peripheral compartments, respectively. The volumes of the central and peripheral compartments are denoted by  $V_1$  and  $V_2$  respectively. The parameters  $k_1$  and  $k_2$  represent the elimination rates through the central and peripheral compartments, while  $r$  corresponds to the infusion rate of the system.

To simplify the representation, we rewrite the ODE system in matrix form:

$$\frac{d}{dt} \begin{pmatrix} A \\ B \\ 1 \end{pmatrix} = \begin{pmatrix} \frac{k_2-k_1}{V_1} & -\frac{k_2}{V_2} & r \\ -\frac{k_2}{V_1} & \frac{k_2}{V_2} & 0 \\ 0 & 0 & 0 \end{pmatrix} \begin{pmatrix} A \\ B \\ 1 \end{pmatrix}$$

To simplify the derivation, we introduce a parameter  $R = \frac{k_2}{V_2}$ , assuming that  $k_2$  and  $V_2$  decrease at the same rate when transitioning from the two-compartment system to a one-compartment system. We denote the matrix above as  $M$ , and with this parameter  $R$ , the updated matrix  $M$  becomes:

$$\begin{pmatrix} \frac{k_2-k_1}{V_1} & -R & r \\ -\frac{k_2}{V_1} & R & 0 \\ 0 & 0 & 0 \end{pmatrix}$$

Next, we diagonalize the matrix  $M$  by calculating its eigenvectors and eigenvalues. After diagonalization, we obtain  $M = S \cdot J \cdot S^{-1}$  where  $S$  is a matrix containing the eigenvectors, and  $J$  is a diagonal matrix with the eigenvalues on the diagonal:

$$S = \begin{pmatrix} \frac{rV_1}{k_1} & \frac{k_1-k_2+RV_1+\sqrt{(-k_1+k_2+RV_1)^2+4k_1RV_1}}{2k_2} & \frac{k_1-k_2+RV_1-\sqrt{(-k_1+k_2+RV_1)^2+4k_1RV_1}}{2k_2} \\ \frac{rk_2}{k_1R} & 1 & 1 \\ 1 & 0 & 0 \end{pmatrix}$$

$$J = \begin{pmatrix} 0 & 0 & 0 \\ 0 & \frac{-k_1+k_2+RV_1-\sqrt{(-k_1+k_2+RV_1)^2+4k_1RV_1}}{2k_2} & 0 \\ 0 & 0 & \frac{-k_1+k_2+RV_1+\sqrt{(-k_1+k_2+RV_1)^2+4k_1RV_1}}{2k_2} \end{pmatrix}$$

$S^{-1} =$

$$\begin{pmatrix} 0 & 0 & 1 \\ \frac{k_2}{\sqrt{(-k_1+k_2+RV_1)^2+4k_1RV_1}} & \frac{-k_1+k_2-RV_1+\sqrt{(-k_1+k_2+RV_1)^2+4k_1RV_1}}{2\sqrt{(-k_1+k_2+RV_1)^2+4k_1RV_1}} & -\frac{k_2r(-k_1+k_2+RV_1+\sqrt{(-k_1+k_2+RV_1)^2+4k_1RV_1})}{2k_1R\sqrt{(-k_1+k_2+RV_1)^2+4k_1RV_1}} \\ \frac{k_2}{\sqrt{(-k_1+k_2+RV_1)^2+4k_1RV_1}} & \frac{k_1-k_2+RV_1+\sqrt{(-k_1+k_2+RV_1)^2+4k_1RV_1}}{2\sqrt{(-k_1+k_2+RV_1)^2+4k_1RV_1}} & -\frac{k_2r(k_1-k_2-RV_1+\sqrt{(-k_1+k_2+RV_1)^2+4k_1RV_1})}{2k_1R\sqrt{(-k_1+k_2+RV_1)^2+4k_1RV_1}} \end{pmatrix}$$

The eigenvalues  $\lambda_1$  and  $\lambda_2$  are given by:

$$\begin{aligned}\lambda_1 &= \frac{-k_1 + k_2 + RV_1 - \sqrt{(k_1 - k_2 - RV_1)^2 + 4k_1RV_1}}{2V_1} \\ \lambda_2 &= \frac{-k_1 + k_2 + RV_1 + \sqrt{(k_1 - k_2 - RV_1)^2 + 4k_1RV_1}}{2V_1}\end{aligned}\quad (2)$$

To express the ODE system in terms of the transformed variables, we rewrite it as  $\frac{dX}{dt} = M \cdot X$ , and obtain  $\frac{dS^{-1}X}{dt} = S^{-1} \cdot M \cdot X = J \cdot S^{-1} \cdot X$  after diagonalization, which implies this linear transformation turns  $X$  to  $S^{-1}X$ . We define  $C$  and  $D$  as linear combinations of  $A$ ,  $B$ , and  $r$  after transformation, resulting in:

$$\begin{aligned}\sqrt{(k_1 - k_2 - RV_1)^2 + 4k_1RV_1} \frac{dC}{dt} &= k_2 \frac{dA}{dt} + (\lambda_2 - R)V_1 \frac{dB}{dt} - \frac{rV_1k_2}{Rk_1} \lambda_2 \\ \sqrt{(k_1 - k_2 - RV_1)^2 + 4k_1RV_1} \frac{dD}{dt} &= -k_2 \frac{dA}{dt} - (\lambda_1 - R)V_1 \frac{dB}{dt} + \frac{rV_1k_2}{Rk_1} \lambda_1\end{aligned}$$

By defining  $\delta = \sqrt{(k_1 - k_2 - RV_1)^2 + 4k_1RV_1}$ , we can combine the previous equations to obtain:

$$\delta \left( \frac{dC}{dt} (\lambda_1 - R) + \frac{dD}{dt} (\lambda_2 - R) \right) = (\lambda_1 - \lambda_2) k_2 \left( \frac{dA}{dt} + \frac{rV_1}{Rk_1} \right) \quad (3)$$

When the initial values are set to  $A(0) = B(0) = 0$ , the following equation holds:

$$\begin{cases} \delta C(t) = -\frac{rV_1k_2}{Rk_1} \lambda_2 e^{\lambda_1 t} \\ \delta D(t) = \frac{rV_1k_2}{Rk_1} \lambda_1 e^{\lambda_2 t} \end{cases} \quad (4)$$

Furthermore, based on the eigenvalue definition, we can derive  $\lambda_1 \lambda_2 = -\frac{Rk_1}{V_1}$  and  $\lambda_2 - \lambda_1 = \frac{\delta}{V_1}$ . By combining (3) and (4), we obtain the following equation:

$$\begin{aligned}A(t) &= \frac{(\lambda_1 V_2 + k_2) V_1}{k_2 V_2} C(t) + \frac{(\lambda_2 V_2 + k_2) V_1}{k_2 V_2} D(t) + rV_1 \\ &= \frac{r(\lambda_1 - R)}{\lambda_1(\lambda_2 - \lambda_1)} (1 - e^{\lambda_1 t}) - \frac{r(\lambda_2 - R)}{\lambda_2(\lambda_2 - \lambda_1)} (1 - e^{\lambda_2 t})\end{aligned}\quad (5)$$

For subsequent time steps, let us assume that for time step  $t_i$ , the initial values are  $A_{t_{i-1}} = X_{i-1}$  and  $B_{t_{i-1}} = Y_{i-1}$ . Consequently, we can derive the following equation:

$$\begin{aligned}\delta C_{t_{i-1}} &= (k_2 X_{i-1} + (\lambda_2 - R)V_1 Y_{i-1} - \frac{rV_1k_2}{Rk_1} \lambda_2) e^{\lambda_1 t} + \frac{rV_1k_2}{Rk_1} \lambda_2 e^{\lambda_1(t-d)} \\ \delta D_{t_{i-1}} &= (-k_2 X_{i-1} - (\lambda_1 - R)V_1 Y_{i-1} + \frac{rV_1k_2}{Rk_1} \lambda_1) e^{\lambda_2 t} - \frac{rV_1k_2}{Rk_1} \lambda_1 e^{\lambda_2(t-d)}\end{aligned}$$

We set the vancomycin dose as  $d_{t_i} = s_i$ , allowing us to derive:

$$\begin{aligned}
A_{t_i} &= \frac{\delta}{V_1} \left( C_{t_i} \frac{(\lambda_1 - R)V_1}{k_2(\lambda_1 - \lambda_2)} + D_{t_i} \frac{(\lambda_2 - R)V_1}{k_2(\lambda_1 - \lambda_2)} \right) - \frac{rk_2}{V_1\lambda_1\lambda_2} \\
&= \frac{\lambda_1 - R}{\lambda_2 - \lambda_1} e^{2\lambda_1\Delta t_i} (X_{i-1} - \frac{(\lambda_2 - R)V_1}{k_2} Y_{i-1}) + \frac{\lambda_2 - R}{\lambda_2 - \lambda_1} 2e^{\lambda_2\Delta t_i} \left( \frac{(\lambda_1 - R)V_1}{k_2} Y_{i-1} - X_{i-1} \right) \\
&\quad + \frac{r}{\lambda_1\lambda_2(\lambda_2 - \lambda_1)} (\lambda_2(\lambda_1 - R)(1 + e^{\lambda_1\Delta t_i})(e^{\lambda_1(\Delta t_i - s_i)} - e^{\lambda_1\Delta t_i}) \\
&\quad + \lambda_1(\lambda_2 - R)(e^{\lambda_2\Delta t_i} - 1)(e^{\lambda_2(\Delta t_i - s_i)} - e^{\lambda_2\Delta t_i}))
\end{aligned} \tag{6}$$

By following this procedure, we can determine the vancomycin concentration in the central compartment at the  $i$ -th time step.
